# Supplementary material for: Plasma Amino Acids and Acylcarnitines Are Associated with the Female but Not Male Adolescent Swimmer’s Performance: An Integration between Mass Spectrometry and Complex Network Approaches
Source: MDPI journal article supplement (doi:10.3390/biology11121734), 2022-11-29
Supplement: s1 [file s1]

**Supplementary Table S3.** Correlations among acylcarnitines and the swimmers' performances over distances and the critical velocity (CV).

|                | Male  |       |       |       |       | Female |       |       |       |       |
|----------------|-------|-------|-------|-------|-------|--------|-------|-------|-------|-------|
|                | 100-m | 200-m | 400-m | 800-m | CV    | 100-m  | 200-m | 400-m | 800-m | CV    |
| Free carnitine | 0.22  | 0.34  | 0.22  | 0.14  | -0.13 | 0.10   | 0.06  | 0.12  | 0.08  | -0.09 |
| C2             | 0.13  | 0.28  | 0.18  | 0.23  | -0.28 | 0.13   | 0.06  | 0.09  | 0.09  | -0.11 |
| C3             | 0.08  | 0.03  | 0.22  | 0.26  | -0.27 | 0.03   | -0.18 | -0.04 | 0.03  | -0.04 |
| C4             | 0.17  | -0.09 | 0.01  | 0.13  | -0.12 | 0.35   | 0.09  | 0.26  | 0.25  | -0.27 |
| C5             | -0.31 | -0.22 | -0.24 | -0.27 | 0.27  | 0.06   | 0.08  | 0.01  | 0.13  | -0.11 |
| C6             | 0.28  | 0.32  | 0.16  | 0.23  | -0.21 | 0.14   | 0.24  | 0.06  | 0.16  | -0.17 |
| C8             | 0.16  | 0.24  | 0.01  | 0.08  | -0.06 | 0.17   | 0.20  | 0.19  | 0.16  | -0.19 |
| C10            | 0.15  | 0.29  | 0.01  | 0.07  | -0.05 | -0.03  | -0.14 | -0.12 | -0.04 | 0.04  |
| C12            | 0.07  | 0.21  | -0.07 | -0.01 | 0.00  | -0.18  | -0.43 | -0.31 | -0.28 | 0.27  |
| C14            | -0.13 | 0.03  | -0.19 | -0.11 | 0.12  | -0.19  | -0.42 | -0.33 | -0.29 | 0.29  |
| C16            | -0.16 | -0.00 | -0.22 | -0.18 | 0.19  | -0.21  | -0.46 | -0.31 | -0.26 | 0.24  |
| C18            | -0.16 | 0.01  | -0.32 | -0.23 | 0.21  | -0.23  | -0.27 | -0.26 | -0.19 | 0.16  |
