# Supplementary material for: Plasma Amino Acids and Acylcarnitines Are Associated with the Female but Not Male Adolescent Swimmer’s Performance: An Integration between Mass Spectrometry and Complex Network Approaches
Source: MDPI journal article supplement (doi:10.3390/biology11121734), 2022-11-29
Supplement: s1 [file s1]

**Supplementary Table S1.** Optimization of multiple reaction monitoring transitions were for each compound analyzed.

| Compound name | Parent ( <i>m/z</i> ) | Daughter ( <i>m/z</i> ) | Dwell (s) | Cone (V) | Collision (V) |
|---------------|-----------------------|-------------------------|-----------|----------|---------------|
| Glycine       | 76.0000               | 30.1000                 | 0.030     | 20       | 7             |
| Alanine       | 90.1000               | 44.1000                 | 0.030     | 20       | 8             |
| Serine        | 106.1000              | 60.0000                 | 0.030     | 14       | 8             |
| Proline       | 116.1000              | 70.0000                 | 0.030     | 20       | 10            |
| Valine        | 118.1000              | 72.1000                 | 0.030     | 20       | 10            |
| Threonine     | 120.1000              | 74.0000                 | 0.030     | 38       | 20            |
| Cysteine      | 122.1000              | 105.0000                | 0.030     | 20       | 10            |
| Glutamine     | 130.0000              | 84.1000                 | 0.030     | 20       | 8             |
| Leucine       | 132.1000              | 85.1000                 | 0.030     | 20       | 9             |
| Ornithine     | 133.0000              | 70.0000                 | 0.030     | 15       | 14            |
| Asparagine    | 133.1000              | 87.0000                 | 0.030     | 20       | 6             |
| Aspartic Acid | 134.1000              | 88.0000                 | 0.010     | 14       | 10            |
| Lysine        | 147.1000              | 84.0000                 | 0.030     | 14       | 14            |
| GlutamicAcid  | 148.1000              | 130.0000                | 0.030     | 20       | 8             |
| Methionine    | 150.0000              | 104.0000                | 0.030     | 20       | 9             |
| Histidine     | 156.1000              | 110.0000                | 0.030     | 20       | 16            |
| Freecarnitine | 162.0000              | 85.0000                 | 0.030     | 40       | 19            |
| C0            | 162.1000              | 85.0000                 | 0.030     | 40       | 19            |
| HidroFC       | 165.1000              | 85.0000                 | 0.030     | 40       | 19            |
| Phenylalanine | 166.1000              | 120.1000                | 0.030     | 20       | 12            |
| Arginine      | 175.1000              | 70.1000                 | 0.030     | 30       | 21            |
| Citrulline    | 176.0000              | 113.0000                | 0.030     | 20       | 14            |
| Tyrosine      | 182.1000              | 136.1000                | 0.030     | 20       | 12            |
| C2            | 204.1000              | 85.0000                 | 0.030     | 35       | 19            |
| Tryptophan    | 205.1000              | 146.0000                | 0.030     | 16       | 18            |
| C3            | 218.1000              | 85.0000                 | 0.030     | 35       | 19            |
| C4            | 232.1000              | 85.0000                 | 0.030     | 35       | 19            |
| C5            | 246.1000              | 85.0000                 | 0.030     | 35       | 19            |
| C6            | 260.0000              | 85.0000                 | 0.030     | 35       | 19            |
| C8            | 288.1000              | 85.0000                 | 0.030     | 40       | 19            |
| C10           | 316.0000              | 85.0000                 | 0.030     | 40       | 19            |
| C12           | 344.0000              | 85.0000                 | 0.030     | 40       | 19            |
| C14           | 372.0000              | 85.0000                 | 0.030     | 40       | 28            |
| C16           | 400.3000              | 85.0000                 | 0.030     | 40       | 25            |
| C16OH         | 416.0000              | 85.0000                 | 0.030     | 40       | 25            |
| C18:1         | 426.0000              | 85.0000                 | 0.030     | 40       | 19            |
| C18           | 428.0000              | 85.0000                 | 0.030     | 40       | 19            |
