# Supplementary material for: Plasma Amino Acids and Acylcarnitines Are Associated with the Female but Not Male Adolescent Swimmer’s Performance: An Integration between Mass Spectrometry and Complex Network Approaches
Source: MDPI journal article supplement (doi:10.3390/biology11121734), 2022-11-29
Supplement: s1 [file s1]

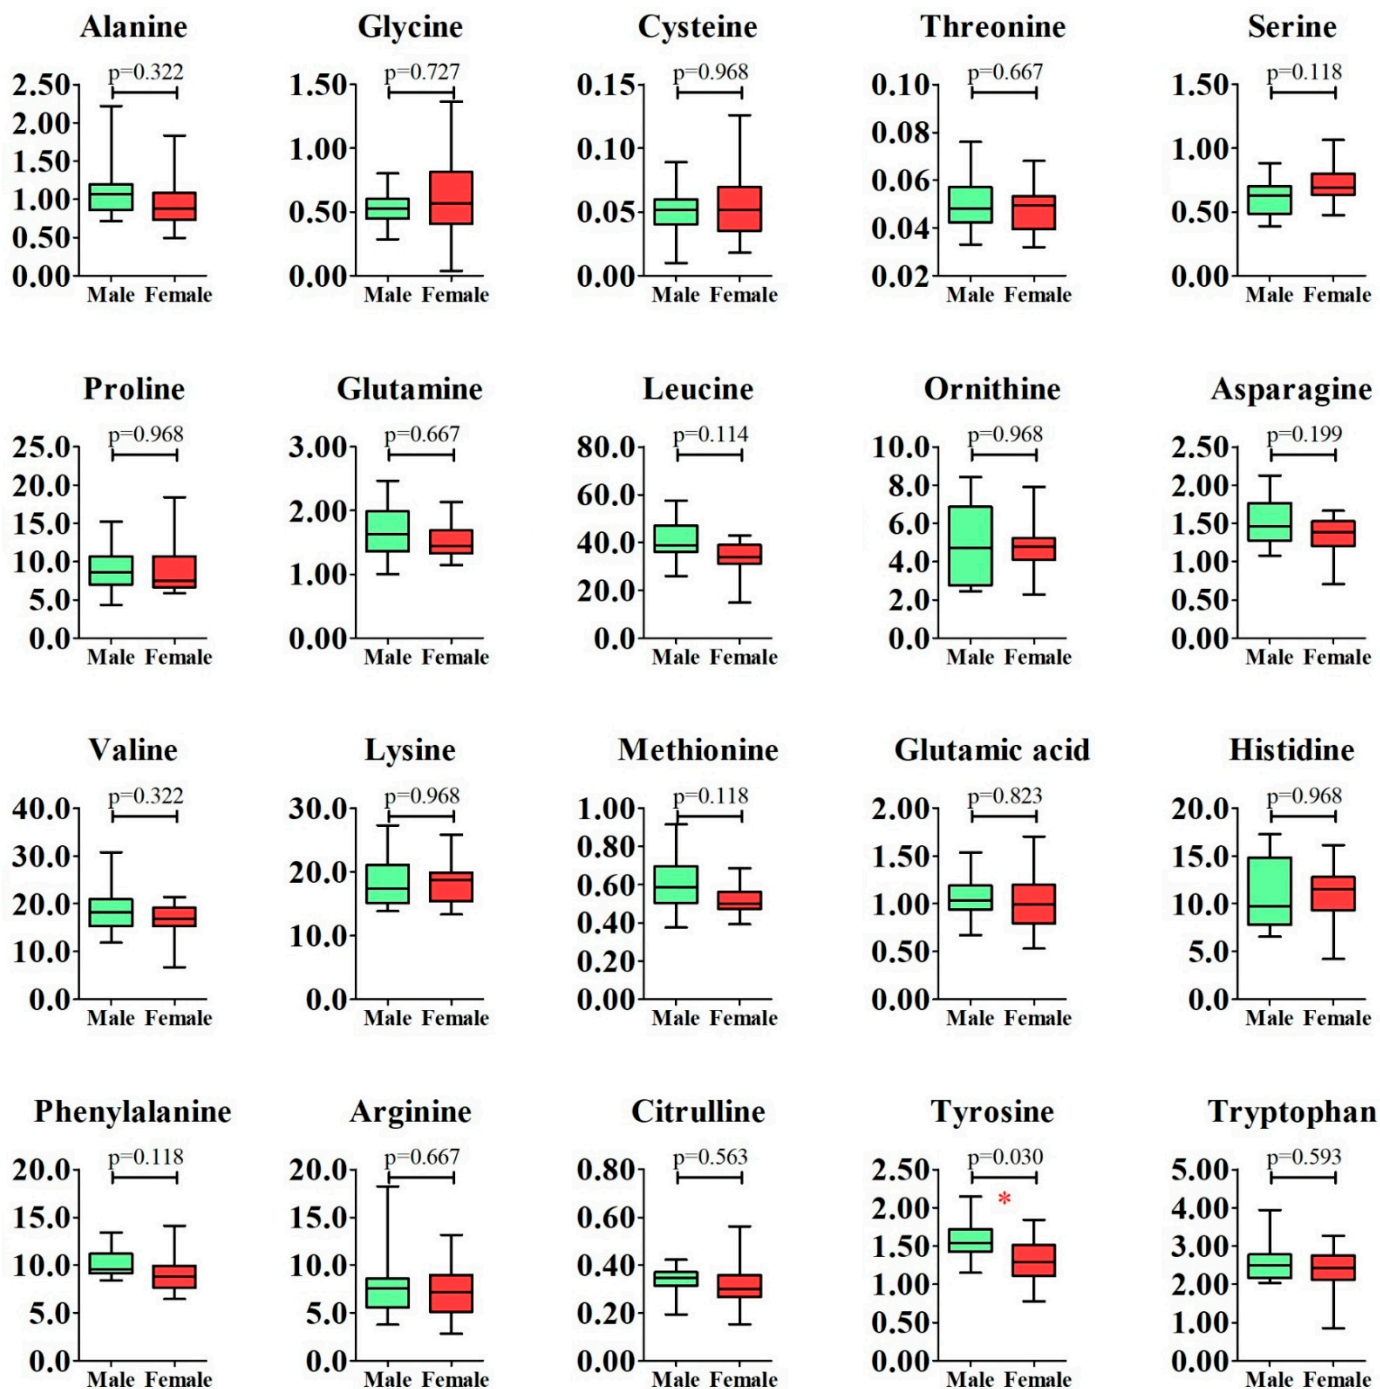

**Supplementary Figure S1.** Comparison of plasma amino acids between male and female adolescent swimmers by the false discovery rate. Values are expressed as normalized intensity.
