# Supplementary material for: Plasma Amino Acids and Acylcarnitines Are Associated with the Female but Not Male Adolescent Swimmer’s Performance: An Integration between Mass Spectrometry and Complex Network Approaches
Source: MDPI journal article supplement (doi:10.3390/biology11121734), 2022-11-29
Supplement: s1 [file s1]

**Supplementary Table S2.** Correlations among amino acids and the swimmers' performances over distances and the critical velocity (CV).

|               | Male  |       |       |       |       | Female |       |       |       |        |
|---------------|-------|-------|-------|-------|-------|--------|-------|-------|-------|--------|
|               | 100-m | 200-m | 400-m | 800-m | CV    | 100-m  | 200-m | 400-m | 800-m | CV     |
| Alanine       | -0.38 | -0.39 | -0.28 | -0.33 | 0.32  | -0.01  | 0.13  | 0.17  | 0.09  | -0.05  |
| Glycine       | -0.07 | 0.04  | -0.05 | -0.05 | -0.00 | 0.16   | 0.13  | 0.17  | 0.13  | -0.15  |
| Cysteine      | 0.06  | 0.17  | 0.08  | 0.02  | -0.02 | 0.14   | 0.08  | 0.03  | 0.02  | -0.05  |
| Threonine     | 0.02  | 0.07  | -0.04 | -0.06 | 0.04  | -0.03  | 0.22  | 0.06  | 0.11  | -0.10  |
| Serine        | -0.05 | -0.02 | -0.24 | -0.19 | 0.23  | -0.06  | -0.16 | -0.26 | -0.17 | 0.18   |
| Proline       | -0.03 | 0.04  | -0.15 | -0.11 | 0.06  | -0.02  | 0.03  | 0.03  | 0.01  | 0.04   |
| Glutamine     | 0.14  | -0.07 | 0.02  | 0.07  | -0.11 | 0.10   | 0.06  | 0.12  | 0.07  | -0.09  |
| Leucine       | -0.13 | -0.07 | -0.17 | -0.17 | 0.16  | -0.19  | -0.08 | -0.16 | -0.06 | 0.08   |
| Ornithine     | 0.04  | 0.18  | -0.02 | -0.05 | 0.03  | 0.18   | 0.09  | 0.03  | 0.11  | -0.10  |
| Asparagine    | -0.17 | -0.11 | -0.19 | -0.20 | 0.18  | -0.23  | -0.16 | -0.25 | -0.15 | 0.17   |
| Valine        | -0.03 | -0.00 | -0.01 | -0.01 | -0.01 | -0.08  | -0.03 | -0.14 | -0.06 | 0.10   |
| Lysine        | 0.07  | 0.11  | 0.08  | 0.04  | -0.08 | 0.10   | -0.04 | 0.07  | 0.08  | -0.11  |
| Methionine    | -0.10 | -0.12 | -0.05 | -0.07 | 0.03  | 0.09   | 0.23  | 0.19  | 0.18  | -0.17  |
| Glutamic acid | 0.11  | 0.06  | 0.17  | 0.09  | -0.13 | 0.13   | 0.09  | 0.14  | 0.09  | -0.11  |
| Histidine     | 0.26  | 0.31  | 0.22  | 0.20  | -0.22 | 0.03   | -0.03 | -0.03 | 0.01  | -0.01  |
| Phenylalanine | -0.13 | -0.27 | -0.05 | -0.12 | 0.11  | 0.17   | 0.30  | 0.28  | 0.36  | -0.38  |
| Arginine      | 0.29  | 0.24  | 0.26  | 0.27  | -0.29 | 0.17   | 0.30  | 0.28  | 0.36  | -0.38  |
| Citrulline    | 0.26  | 0.24  | 0.12  | 0.24  | -0.30 | 0.08   | -0.16 | -0.10 | -0.03 | 0.07   |
| Tryptophan    | 0.28  | 0.32  | 0.34  | 0.21  | -0.19 | 0.10   | 0.06  | 0.12  | 0.07  | -0.09  |
| Tyrosine      | 0.08  | -0.02 | 0.09  | 0.06  | -0.04 | 0.48*  | 0.41  | 0.47* | 0.52* | -0.51* |
